# Supplementary material for: Generation of mesenchyme free intestinal organoids from human induced pluripotent stem cells
Source: PubMed Central journal article supplement (PMC6954238; doi:10.1038/s41467-019-13916-6), 2020-01-10
Supplement: 41467_2019_13916_MOESM7_ESM.pdf [file 41467_2019_13916_MOESM7_ESM.pdf]

**Generation of Mesenchyme Free Intestinal Organoids from  
Human Induced Pluripotent Stem Cells**

Mithal *et al.*

**Supplementary Information**



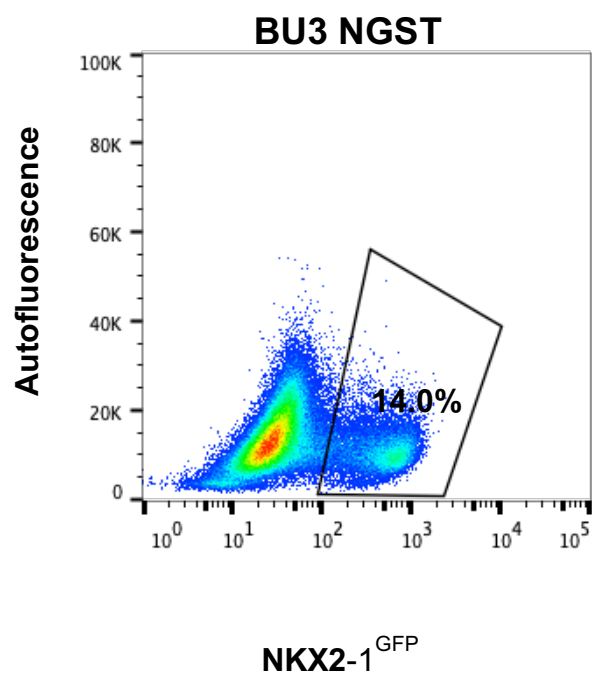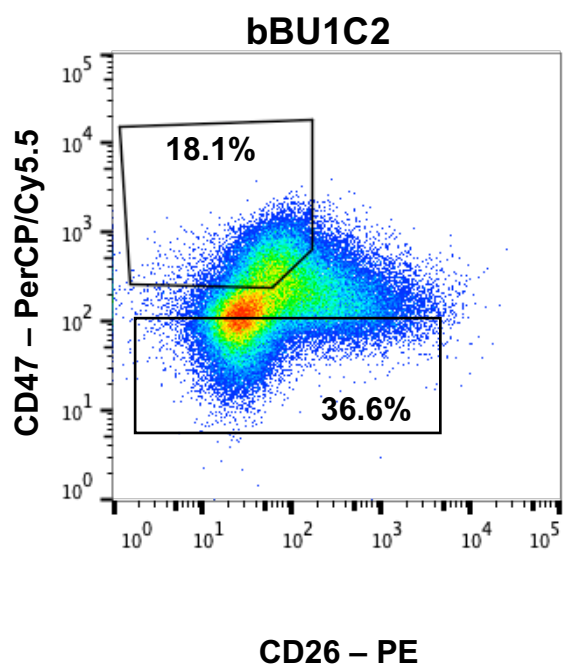

**Supplementary Figure 2. Representative FACS plots of day 15 progenitors.** Plots of day 15 progenitors from BU3NGST and bBU1C2 differentiations for expression of NKX2-1<sup>GFP</sup> or CD47/CD26 respectively.

**a**

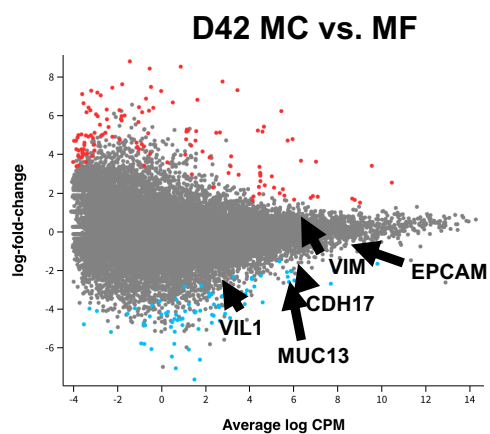

**b**

### Downregulated Genes (75)

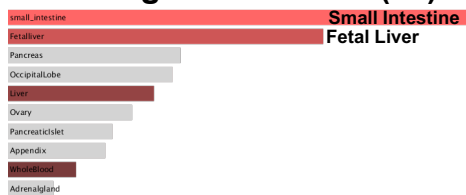

### Upregulated Genes (130)

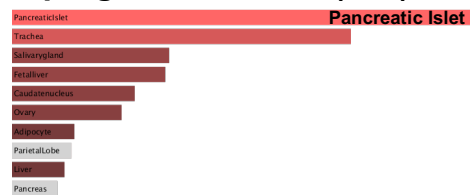

**Supplementary Figure 3. RNA-Seq Analysis of D42 HIOs.** **a** Mean Average Plots of significantly differentially expressed genes that were either significantly upregulated (red) or downregulated (blue) in RNA-seq analysis from day 42 MC-derived HIOs as compared to day 42 MF differentiations, both cultured in IM+CHIR. **b** Gene set enrichment analysis using Enrichr showing the top tissue types when referenced to the human gene atlas, Length of red bars indicates combined enrichment score. All colored bars indicate  $p < 0.05$ .



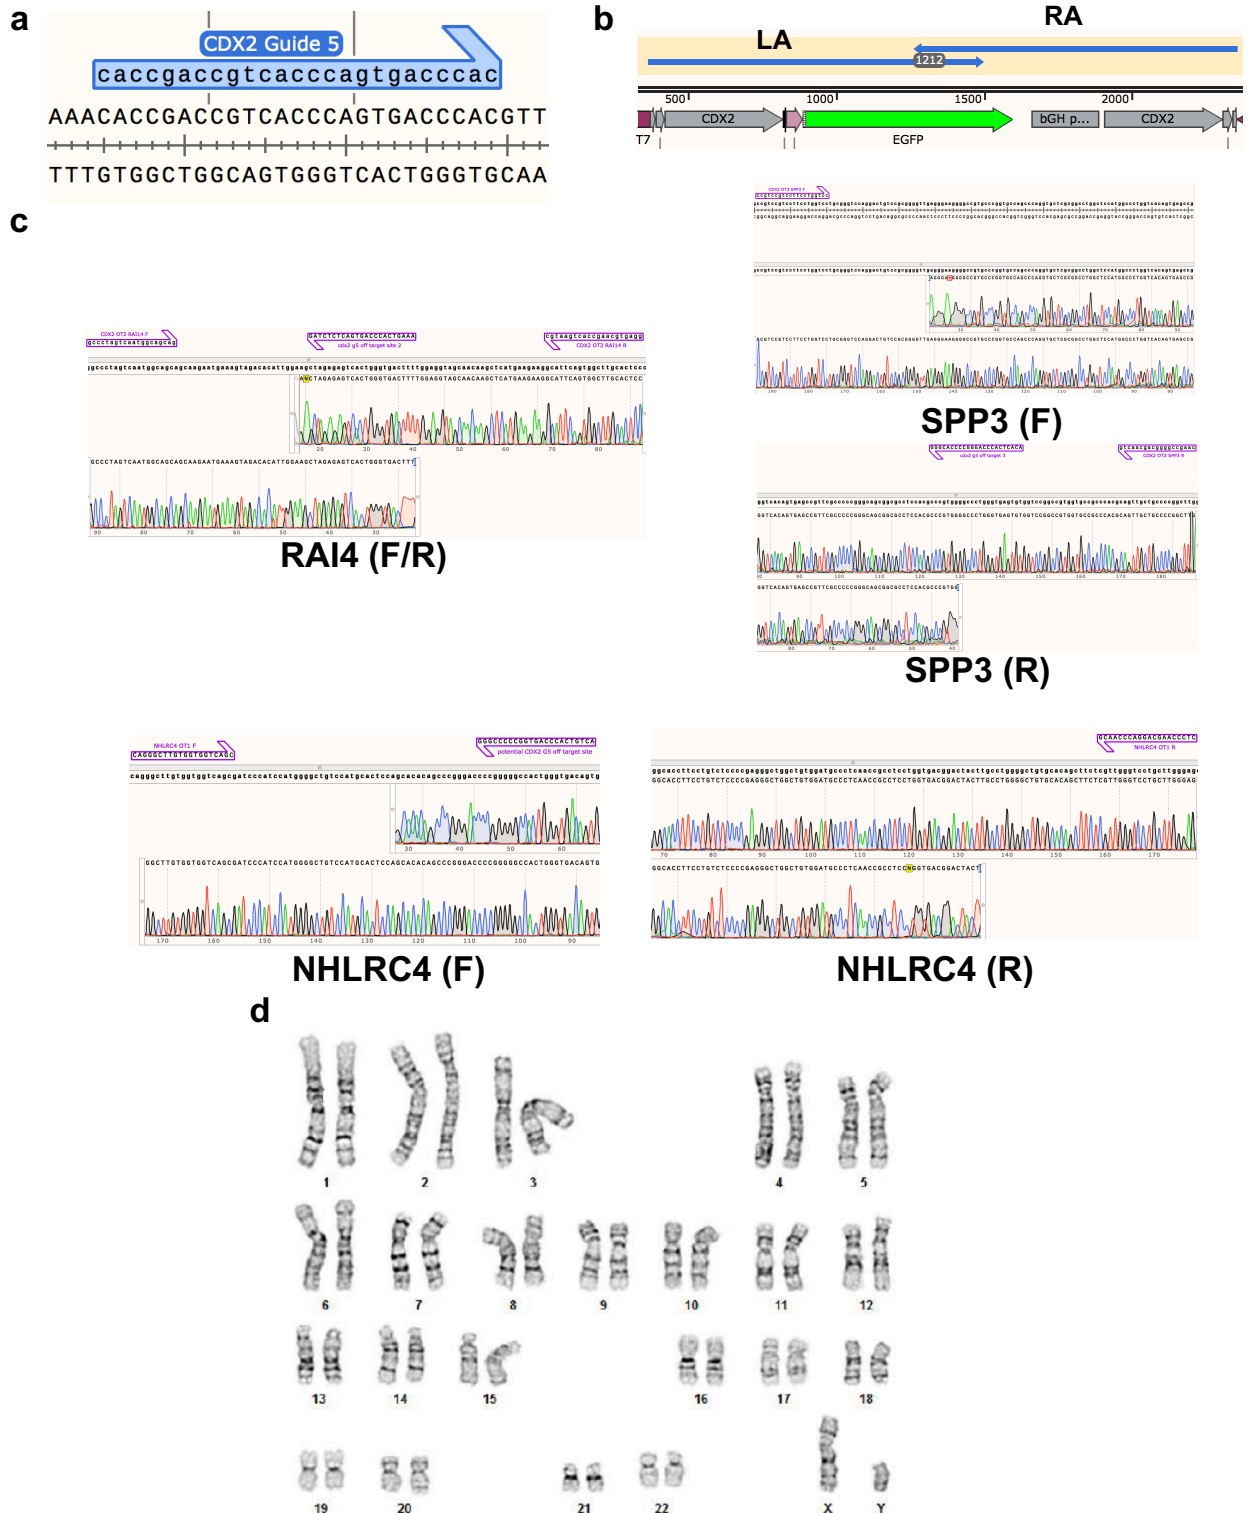

**Supplementary Figure 4. Generation and Characterization of bBU1c2-CDX2GFP (BU1cG).** **a.** Sequence and alignment of the Cas9 sgRNA used to gene edit bBU1c2. **b** Sequence alignment of left (LA) and right (RA) arms. **c.** Sequencing for insertion at the three most likely CRISPR off target cut sites based on the G5 sgRNA, NHLRC4, RAI4, and SPP3, with sequencing primers and predicted cut sites shown above. **d.** Normal karyotype of bBU1cG after gene editing.

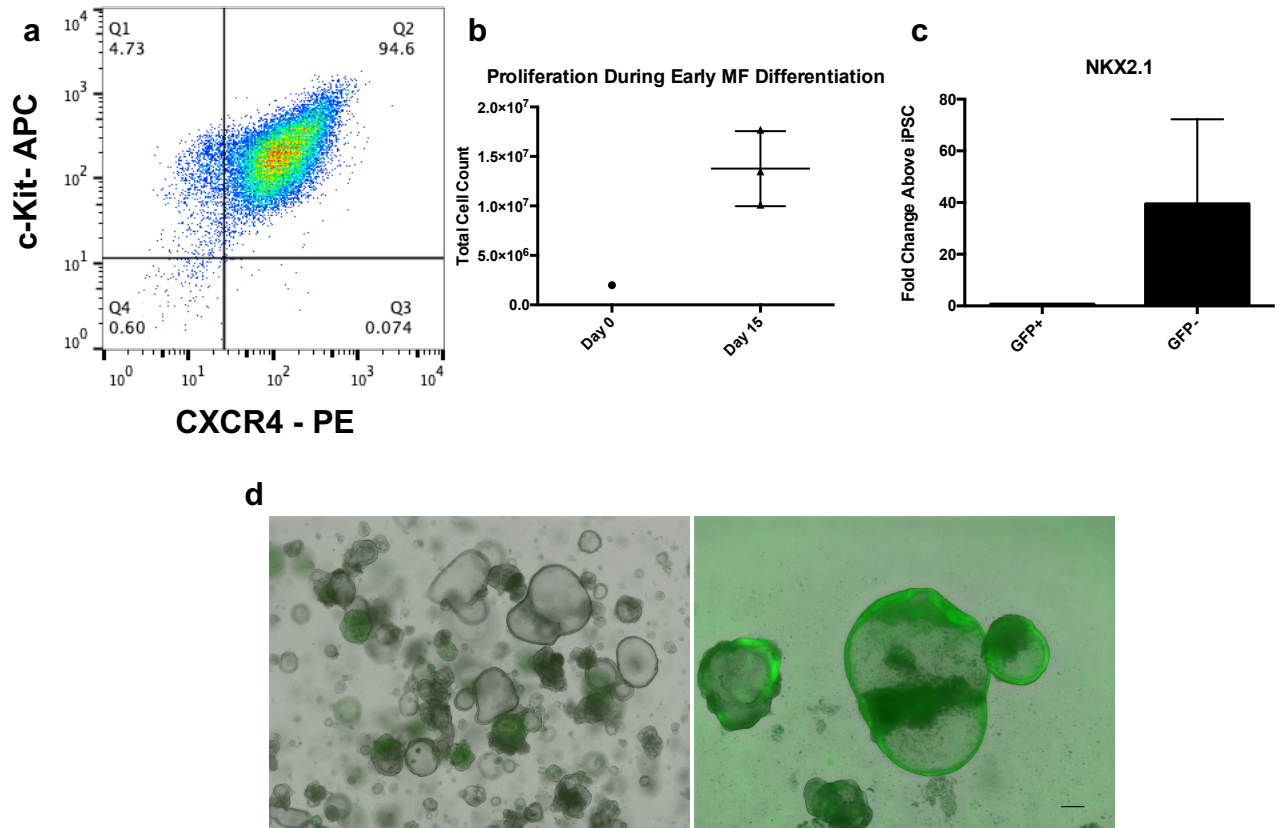

**Supplementary Figure 5. NKX2-1 is enriched in the CDX2<sup>GFP</sup> neg outgrowth.** **a** Representative flow cytometry of Day 3 CXCR4/c-kit<sup>+/+</sup> definitive endoderm. **b** Proliferation of cells early in the MF differentiation representing average cell output at day 15 per input well of  $2 \times 10^6$  hiPSCs at day 0 ( $n=3$  cell lines) **c** qRT-PCR at day 50 for *NKX2-1* shows that expression of *NKX2-1* tracks with the day 15 CDX2<sup>GFPneg</sup> sorted outgrowth ( $n=2$ , represents  $2^{-\Delta\Delta C_t}$ , normalized to Day 0 hiPSC and *GAPDH*). **d** Representative micrographs at day 60 show outgrowth that are mostly GFP negative in the GFP- sorted condition (left), as compared to the sustained maintenance of GFP expression in the GFP+ sorted cells (right).

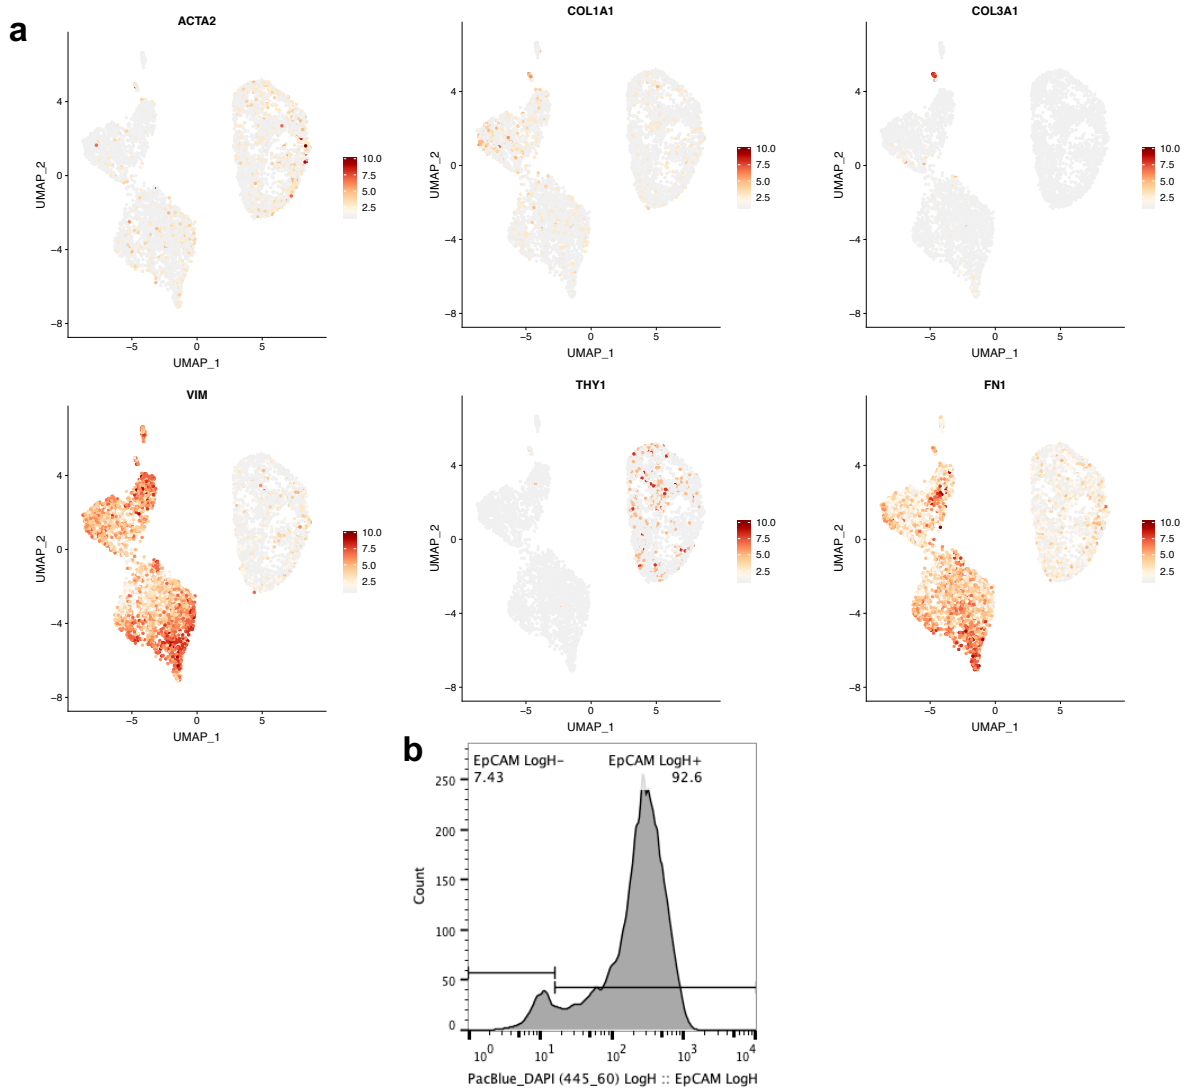

**No Sort: Day 30 outgrowth**

**Supplementary Figure 6. Expression Profile of Mesenchymal Genes by scRNAseq.** (a) UMAP expression plots of day 6 and day 13 progenitors (as described in Fig. 2) for a variety of mesenchymal-specific genes. (b) Flow cytometry for epithelial-marker EpCAM of D30 outgrowth of the MF protocol in IM+CK, omitting the D15 sorting step.

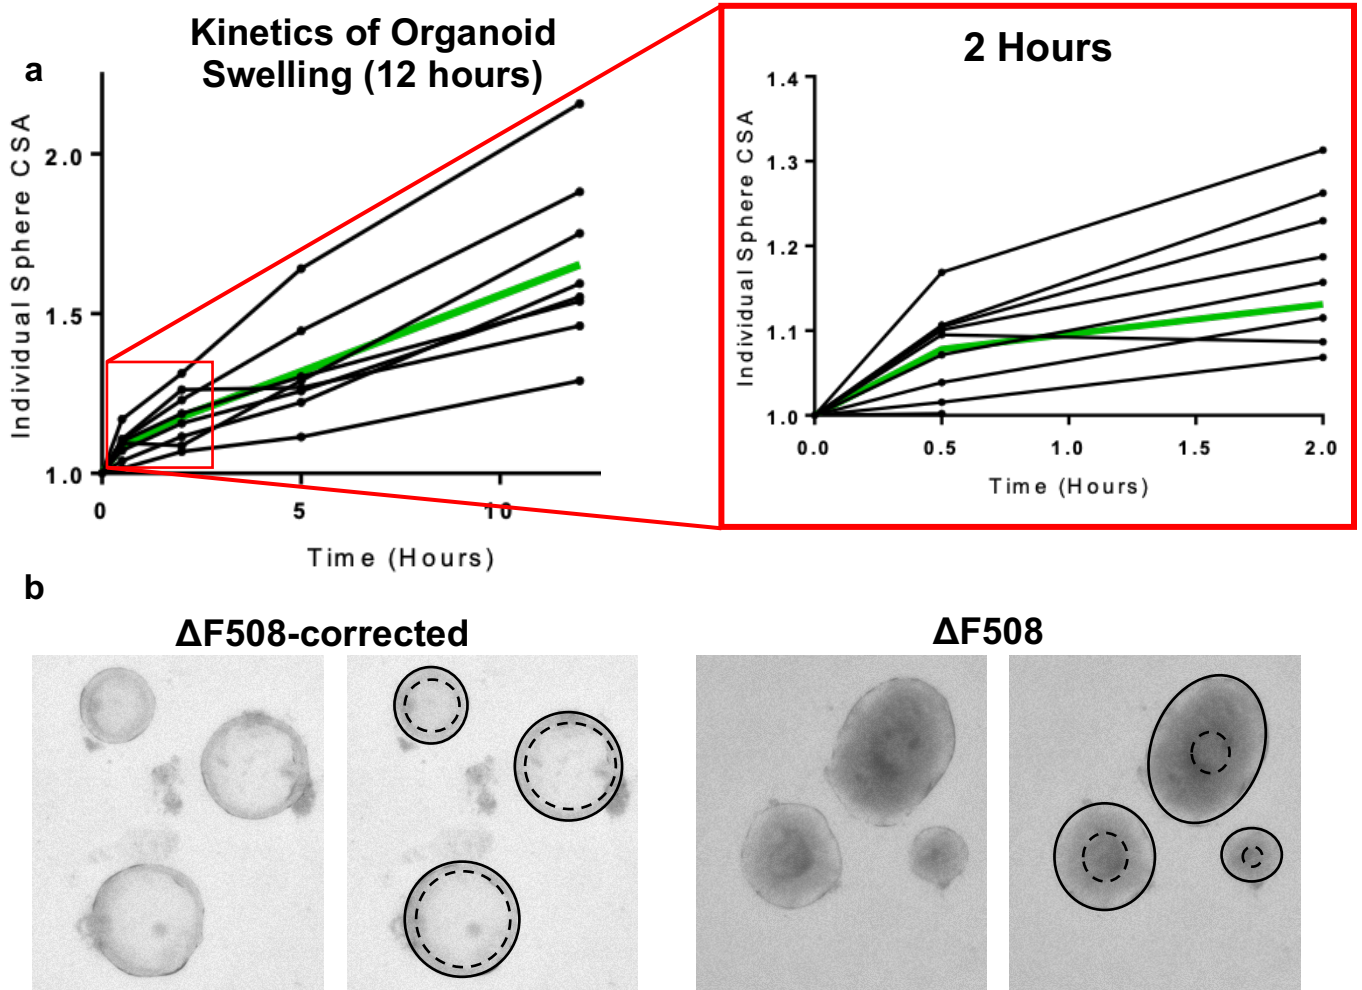

**Supplementary Figure 7. Characterization of forskolin-induced HIO swelling.** **a** Kinetics of individual organoid swelling for 12 hours after Forskolin treatment in WT HIOs. Green line indicates mean organoid CSA. **b** Representative images of analysis of SLA in  $\Delta$ F508 and  $\Delta$ F508-corrected HIOs (solid line indicates organoid perimeter, dotted line indicates luminal perimeter).

| <b>Supplementary Table 1: Growth Factors, Cytokines, and Other Tissue Culture Reagents</b> |                              |                     |
|--------------------------------------------------------------------------------------------|------------------------------|---------------------|
| <b>Name</b>                                                                                | <b>Source</b>                | <b>Catalog #/ID</b> |
| Growth Factor Reduced Matrigel                                                             | Corning                      | 356230              |
| Matrigel Basement Membrane Matrix                                                          | Corning                      | 354234              |
| SB431542                                                                                   | Tocris                       | 1614                |
| Dorsomorphin                                                                               | Stemgent                     | 04-0024             |
| CHIR99021                                                                                  | Tocris                       | 4423                |
| Recombinant human FGF10                                                                    | R&D Systems                  | 345-FG-025          |
| Recombinant human KGF                                                                      | R&D Systems                  | 251-KG-010          |
| Recombinant human BMP4                                                                     | R&D Systems                  | 314-BP              |
| Retinoic acid                                                                              | Sigma                        | R2625               |
| Y-27632 dihydrochloride                                                                    | Tocris                       | 1254                |
| Dexamethasone                                                                              | Sigma                        | D4902               |
| 8-bromoadenosine 3',5'-cyclic monophosphate sodium salt (cAMP)                             | Sigma                        | B7880               |
| 3-Isobutyl-1-methylxanthine (IBMX)                                                         | Sigma                        | I5879               |
| Hoechst                                                                                    | Thermo Fisher                | H3570               |
| Recombinant Human FGF4                                                                     | R&D Systems                  | 235-F4-025          |
| 0.05% trypsin-EDTA                                                                         | Invitrogen                   | 25300-120           |
| Defined Fetal Bovine Serum                                                                 | Thermo Fisher                | NC0652331           |
| Recombinant human Noggin                                                                   | R&D Systems                  | 6057NG025           |
| Recombinant human EGF                                                                      | R&D Systems                  | 236EG200            |
| Recombinant Human R-Spondin 1 Protein                                                      | R&D Systems                  | 4645-RS-025         |
| N2 Supplement                                                                              | Invitrogen                   | 17502-048           |
| B27 Supplement                                                                             | Invitrogen                   | 12587-010           |
| GlutaMAX™                                                                                  | Thermo Fisher                | 35050061            |
| Gentle Cell Dissociation Reagent                                                           | StemCell Technologies        | 07174               |
| Ascorbic Acid                                                                              | Sigma                        | A4403               |
| Cell Recovery Solution                                                                     | Corning                      | 354253              |
| Paraformaldehyde                                                                           | Electron Microscopy Sciences | 19208               |
| ReLeSR                                                                                     | StemCell Technologies        | 05873               |
| StemDiff Definitive Endoderm Kit                                                           | StemCell Technologies        | 05110               |
| Accumax™                                                                                   | Sigma                        | A7089               |

**Supplementary Table 2: Media Recipes/Composition**

| <b>Media</b>                                              | <b>Base</b>             | <b>Cytokines/Growth Factors</b>   | <b>Concentration</b> |
|-----------------------------------------------------------|-------------------------|-----------------------------------|----------------------|
| <b>IM+CHIR</b>                                            | DMEM F/12               | Noggin                            | 500ng/mL             |
|                                                           | Primocin (100ng/mL)     | R-Spondin                         | 100ng/mL             |
|                                                           | B27                     | EGF                               | 100ng/mL             |
|                                                           | HEPES                   | CHIR99021                         | 3µM                  |
|                                                           | Glutamax (100x)         |                                   |                      |
|                                                           | N2                      |                                   |                      |
| <b>IM+CK</b>                                              | DMEM F/12               | Noggin                            | 500ng/mL             |
|                                                           | Primocin (100ng/mL)     | R-Spondin                         | 100ng/mL             |
|                                                           | B27                     | EGF                               | 100ng/mL             |
|                                                           | HEPES                   | CHIR99021                         | 3 µM                 |
|                                                           | Glutamax (100x)         | KGF/FGF7                          | 10ng/mL              |
|                                                           | N2                      |                                   |                      |
| <b>Hindgut Media</b>                                      | RPMI-1640               | CHIR99021                         | 3µM                  |
|                                                           | Fetal Bovine Serum (2%) | FGF4                              | 500ng/mL             |
| <b>Complete Serum Free Differentiation Medium (csFDM)</b> | IMDM (75%)              |                                   |                      |
|                                                           | Ham's F/12 (25%)        |                                   |                      |
|                                                           | B27 (with RA)           |                                   |                      |
|                                                           | N2                      |                                   |                      |
|                                                           | 0.05% BSA               |                                   |                      |
|                                                           | Primocin (100ng/mL)     |                                   |                      |
|                                                           | Glutamax (100x)         |                                   |                      |
|                                                           | Ascorbic Acid (50ug/mL) |                                   |                      |
| MTG (0.45mM)                                              |                         |                                   |                      |
| <b>CK+DCI</b>                                             | cSFDM                   | CHIR99021                         | 3µM                  |
|                                                           |                         | KGF/FGF7                          | 10ng/mL              |
|                                                           |                         | Dexamethasone                     | 50nM                 |
|                                                           |                         | cAMP                              | 0.1mM                |
|                                                           |                         | 3-isobutyl-1-methyxanthine [IBMX] | 0.1mM                |

| <b>Supplementary Table 3: Sequence Based Reagents</b> |                                 |
|-------------------------------------------------------|---------------------------------|
| <b>Description</b>                                    | <b>Cat No</b>                   |
| <b>Taqman Probes</b>                                  |                                 |
| CDH17                                                 | Hs00900408_m1                   |
| GAPDH                                                 | Hs99999905_m1                   |
| CDX2                                                  | Hs01078080_m1                   |
| PDX1                                                  | Hs00426216_m1                   |
| LYZ                                                   | Hs00426232_m1                   |
| ALB                                                   | Hs00609411_m1                   |
| PGC                                                   | Hs00160052_m1                   |
| CFTR                                                  | Hs00357011_m1                   |
| VIL1                                                  | Hs00200229_m1                   |
| GATA4                                                 | Hs00171403_m1                   |
| <b>Miscellaneous</b>                                  |                                 |
| Human Colon RNA                                       | ThermoFisher Scientific: AM7986 |
| <b>SYBR Green Primers (IDT)</b>                       |                                 |
| SATB2 F                                               | CCACCTTCCCAGCTTGATT             |
| SATB2 R                                               | TTAGCCAGCTGGTGGAGACT            |
| MUC2 F                                                | CCTTGAACGCAAAGTGGAATC           |
| MUC2 R                                                | GACATGCTGTTCTGAATCTGAG          |
| BACTIN F                                              | CATGTACGTTGCTATCCAGGC           |
| BACTIN R                                              | CTCCTTAATGTCACGCACGAT           |
| VIMF                                                  | CCTTGAACGCAAAGTGGAATC           |
| VIMR                                                  | GACATGCTGTTCTGAATCTGAG          |
| <b>CDX2 eGFP Knock-In</b>                             |                                 |
| spCAS9 G5F                                            | CACCGACCGTCACCCAGTGACCCAC       |
| spCAS9 G5R                                            | AAACGTGGGTCACCTGGGTGACGGTC      |
| CDX2 INSERT TEST F                                    | AGCCTCCTTCTACCTTTAGTCC          |
| CDX2 INSERT TEST R                                    | AGCACCTGGCCATTTCAGATG           |
| CDX2 OT1 NHLRC4 F                                     | CAGGGCTTGTGGTGGTCAGC            |
| CDX2 OT1 NHLRC4 R                                     | CTCCAAGCAGGACCCAACG             |
| CDX2 OT2 RAI14 F                                      | GCCCTAGTCAATGGCAGCAG            |
| CDX2 OT2 RAI14 R                                      | GGAGTGCAAGCCACTGAATGC           |
| CDX2 OT3 SPP3 F                                       | CCGTCCGTCCTTCTGGTCC             |
| CDX2 OT3 SPP3 R                                       | CAAGCCGGGGCAGCAACTG             |

| <b>Supplementary Table 4: Antibodies/Dyes, and Reagents for Immunostaining</b> |                             |                   |
|--------------------------------------------------------------------------------|-----------------------------|-------------------|
| <b>Target</b>                                                                  | <b>Vendor</b>               | <b>Catalog No</b> |
| Anti-human CD47 PerCP/Cy5.5 Conjugate                                          | BioLegend                   | 323110            |
| Anti-human CD26 PE Conjugate                                                   | BioLegend                   | 302705            |
| Calcein Blue                                                                   | Life Technologies           | C1429             |
| Anti-human CXCR4 - PE                                                          | ThermoFisher                | MHCXCR404         |
| Anti-human c-Kit - APC                                                         | BioLegend                   | 323205            |
| Donkey serum                                                                   | Jackson ImmunoResearch Labs | 017-000-121       |
| Donkey anti-goat DyLight 488                                                   | ThermoFisher Scientific     | SA5-10086         |
| Cy™3 AffiniPure Donkey Anti-Rabbit                                             | Jackson ImmunoResearch Labs | 711-165-152       |
| Donkey anti-Mouse IgG DyLight 488                                              | ThermoFisher Scientific     | SA5-10166         |
| 13 mm cover slips                                                              | ThermoFisher Scientific     | 174950            |
| Fluoromont -G                                                                  | Southern Biotech            | 0100-01           |
| Rabbit anti-CDX2                                                               | ThermoFisher Scientific     | MA5-14494         |
| Anti-chromogranin A                                                            | abcam                       | ab15160           |
| Anti-Vimentin antibody                                                         | abcam                       | ab8978            |
| HistoGel™ Specimen Processing Gel                                              | Richard Allen Scientific    | 11330057          |
| Mouse anti-Villin                                                              | Millipore                   | MAB1671           |
| Hoechst 33342                                                                  | ThermoFisher Scientific     | 62249             |
| Anti- MUC2                                                                     | SantaCruz                   | sc-515032         |
| Anti- Lyz                                                                      | ThermoFisher Scientific     | PA1-29680         |
| Chicken Anti- GFP IgY                                                          | ThermoFisher Scientific     | A10262            |
| Donkey anti-chicken AF488                                                      | Jackson ImmunoResearch Labs | 703-545-155       |
