# Supplementary material for: Generation of mesenchyme free intestinal organoids from human induced pluripotent stem cells
Source: PubMed Central journal article supplement (PMC6954238; doi:10.1038/s41467-019-13916-6), 2020-01-10
Supplement: 41467_2019_13916_MOESM10_ESM.pdf [file 41467_2019_13916_MOESM10_ESM.pdf]

**Title:** Supplementary Movie 1:

**Description:** 19-hour time lapse of BU1CG (Control) HIOs treated with forskolin

**Title:** Supplementary Movie 2:

**Description:** 19-hour time lapse of BU1CG (Control) HIOs treated with DMSO

**Title:** Supplementary Movie 3:

**Description:** 19-hour time lapse of RC204 ( $\Delta$ F508 uncorrected) HIOS treated with forskolin

**Title:** Supplementary Movie 4:

**Description:** 19-hour time lapse of RC204 ( $\Delta$ F508 uncorrected) HIOs treated with DMSO

**Title:** Supplementary Movie 5:

**Description:** 19-hour time lapse of RC204-corr ( $\Delta$ F508 corrected) HIOs treated with forskolin

**Title:** Supplementary Movie 6:

**Description:** 19-hour time lapse of RC204-corr ( $\Delta$ F508 corrected) HIOs treated with DMSO Scale Bar = 250 $\mu$ m, Time scale indicates elapsed time from t = 0hr.
